# Supplementary material for: Significance of Glioma Stem-Like Cells in the Tumor Periphery That Express High Levels of CD44 in Tumor Invasion, Early Progression, and Poor Prognosis in Glioblastoma
Source: Stem Cells Int. 2018 Aug 23;2018:5387041. doi: 10.1155/2018/5387041 (PMC6126065; doi:10.1155/2018/5387041)
Supplement: Supplementary Materials — Supplementary Table 1: oligonucleotide primers used in this study for qRT-PCR. Supplementary Table 2: summary of clinical features. [file 5387041.f1.xls]

## Sheet: Supple Table S1
	Supplementary Table S1. Oligonucleotide primers used in this study for qRT-PCR
	Gene	Sense/antisense
	Nestin	5’-AGACTTCCCTCAGTTTAGG-3’
		5’-CAGGTGTCTCAAGGGTAGCAG-3’
	CD133	5’-GCATTGGCATCTTCTATGGTT-3’
		5’-CGCCTTGTCCTTGGTAGTGT-3’
	CD15	5’-ACTCGCAGCACCTGGATTAT-3’
		5’-CGAGGAAAAGCAGGTACGAG-3’
	CD44	5’-AGAAGGTGTGGGCAGAAGAA-3’
		5’-AAATGCACCATTTCCTGAGA-3’
	Bmi-1	5'-GGAGACCAGCAAGTATTGTCCTTTTG-3'
		5'-CATTGCTGCTGGGCATCGTAAG-3'
	Sox2	5'-TACAGCATGTCCTACTCGCAG-3'
		5'-GAGGAAGAGGTAACCACAGGG-3'
	Oct3/4	5'-AGCGAACCAGTATCGAGAAC-3'
		5'-GCCTCAAAATCCTCTCGTTG-3'
	CXCR4	5’-GATCAGCATCGACTCCTTCA-3’
		5’-GGCTCCAAGGAAAGCATAGA-3’
	HIF-1α	5’- TGAGGAAATGAGAGAAATGCTTAC -3’
		5’- ACACTGAGGTTGGTTACTGTTGGT -3’
	HIF-2α	5’- AGTGGCCTTTTTCTGAGATG -3’
		5’- GGAGAAGGAGGGAGAGAAAC -3’
	VEGF	5'- GGCGAAGAGAAGAGACACAT -3'
		5'- GAGGAAGGTCAACCACTCAC -3'
	TGF-β	5’-GCCCTGGACACCAACTATTG-3’
		5’-CGTGTCCAGGCTCCAAATG-3’
	GAPDH	5'- CAGTCAGCCGCATCTTCTTT -3'
		5'- TGACGGTGCCATGGAATTTG -3'

## Sheet: Supple Table S2
Supplementary Table S2. Summary of clinical features
Patient No.	Age (ys)	Sex	KPS preop.	EOR	Pathology		Progression
					MGMT(m)	Ki-67(C)(%)
1	69	M	70	PR	-	94.3	Dissem
2	63	F	70	GTR	-	34.8	-
3	65	F	70	GTR	-	68	-
4	62	M	90	STR	-	39.2	LR
5	73	M	80	GTR	+	22.4	LR
6	66	M	80	GTR	+	43.1	LR
7	53	M	90	GTR	-	14.9	LR
8	61	F	70	GTR	+	26	LR
9	75	F	60	STR	+	53.4	#
10	79	M	70	GTR	-	57	LR
11	75	M	70	GTR	+	37	LR
12	44	M	90	GTR	-	30	-
13	78	M	90	GTR	+	33	Dissem
KPS: Karnofsky performance status score, EOR: extent of resection, MGMT(m): methylation of O(6)-methylguanine-DNA methyltransferase, Ki-67(C): Ki-67 stain of tumor core, M:male, F: female, PR: partial resection, GTR:gross total resection, STR:subtotal resection, Dissem: dissemination, LR: local recurrence, #: died of pulmonary embolism at 7 days after operation
